# Supplementary material for: The Effectiveness of Free Face Mask Distribution on Use of Face Masks. A Cluster Randomised Trial in Stovner District of Oslo, Norway
Source: MDPI journal article supplement (doi:10.3390/ijerph18178971), 2021-08-26
Supplement: s1 [file s1]

**Table S1.** Descriptive statistics by store, weighted by number of observations.

|         | <b>Face mask<br/>distribution</b> | <b>Number<br/>of days</b> | <b>Wearing<br/>mask (%)</b> | <b>Wearing mask<br/>correctly (%)</b> | <b>Customers per day<br/>(mean)</b> |
|---------|-----------------------------------|---------------------------|-----------------------------|---------------------------------------|-------------------------------------|
| Store 1 | Distribution                      | 5                         | 98.6                        | 98.5                                  | 208                                 |
|         | No distribution                   | 8                         | 93.6                        | 92.5                                  | 240                                 |
| Store 2 | Distribution                      | 11                        | 95.4                        | 94.0                                  | 108                                 |
|         | No distribution                   | 2                         | 91.5                        | 89.1                                  | 101                                 |
| Store 3 | Distribution                      | 6                         | 98.2                        | 97.2                                  | 281                                 |
|         | No distribution                   | 7                         | 95.3                        | 93.1                                  | 320                                 |
| Store 4 | Distribution                      | 7                         | 97.0                        | 92.5                                  | 254                                 |
|         | No distribution                   | 6                         | 87.8                        | 81.7                                  | 297                                 |
| Store 5 | Distribution                      | 8                         | 97.7                        | 95.9                                  | 148                                 |
|         | No distribution                   | 5                         | 90.6                        | 88.2                                  | 131                                 |
| Store 6 | Distribution                      | 5                         | 96.2                        | 94.4                                  | 65                                  |
|         | No distribution                   | 8                         | 91.5                        | 90.8                                  | 72                                  |
| Store 7 | Distribution                      | 5                         | 92.8                        | 90.5                                  | 53                                  |
|         | No distribution                   | 8                         | 72.7                        | 68.2                                  | 59                                  |
| Store 8 | Distribution                      | 5                         | 96.0                        | 92.3                                  | 367                                 |
|         | No distribution                   | 8                         | 93.0                        | 90.5                                  | 400                                 |
| Store 9 | Distribution                      | 9                         | 98.8                        | 97.4                                  | 145                                 |
|         | No distribution                   | 4                         | 93.4                        | 90.5                                  | 142                                 |
| Total   | Distribution                      | 61                        | 97.2                        | 95.0                                  | 221                                 |
|         | No distribution                   | 56                        | 91.7                        | 88.4                                  | 281                                 |
