# Supplementary material for: The Effectiveness of Free Face Mask Distribution on Use of Face Masks. A Cluster Randomised Trial in Stovner District of Oslo, Norway
Source: MDPI journal article supplement (doi:10.3390/ijerph18178971), 2021-08-26
Supplement: s1 [file s1]

**Table S2.** Results, main regression and sensitivity checks.

| Sample →                 |                   | Full sample       |                   |                   | Days 4, 5, 7, 8, & 10-13 |                   |
|--------------------------|-------------------|-------------------|-------------------|-------------------|--------------------------|-------------------|
| Dependent variable →     | Mask usage        | Correct usage     | Mask usage        | Correct usage     | Mask usage               | Correct usage     |
|                          | (1)               | (2)               | (3)               | (4)               | (5)                      | (6)               |
| Face mask distribution   | 6.00***<br>(1.07) | 7.25***<br>(1.14) | 5.84***<br>(0.99) | 7.06***<br>(1.04) | 6.03***<br>(0.86)        | 6.78***<br>(0.93) |
| Observations per cluster |                   |                   | -0.01<br>(0.01)   | -0.01<br>(0.01)   |                          |                   |
| Store controls           | Yes               | Yes               | Yes               | Yes               | Yes                      | Yes               |
| Day controls             | Yes               | Yes               | Yes               | Yes               | Yes                      | Yes               |
| R2                       | 0.6749            | 0.6893            | 0.6812            | 0.6945            | 0.7288                   | 0.7552            |
| N (clusters)             | 117               | 117               | 117               | 117               | 72                       | 72                |
| n (individuals)          | 21,524            | 21,524            | 21,524            | 21,524            | 12,942                   | 12,942            |

All numbers are per 100. Standard errors clustered at the store level in parenthesis. \* p<10%, \*\* p<5%, \*\*\*p<1%
